# Supplementary material
Source: ML conference proceedings conference paper supplement (https://proceedings.mlr.press/v108/sondhi20a.html)
Supplement: Supplementary file [file sondhi20a-supp.pdf]

## A Appendix

### A.1 Proposition 3 of Menon and Ong (2016)

**Proposition 5.** Let  $P$  be the class conditional  $p(C = 1|s, a)$  and  $Q$  be the class conditional  $p(C = 0|s, a)$  with marginal class probability  $\frac{1}{2}$ . Let  $\mathcal{D}(P, Q, \frac{1}{2})$  be the joint distribution over  $C, S, A$  decomposed into  $P$  and  $Q$  and the marginal  $p(C) = \frac{1}{2}$ . Under assumption A5, for any scorer  $\bar{s} : \mathcal{X} \rightarrow \mathbb{R}$ ,  $\text{regret}(\bar{s}; \mathcal{D}, \ell) = \frac{1}{2} \mathbb{E}_{X \sim Q} [B_{f^\circledast}(\rho, \hat{\rho})]$ , where  $f^\circledast(z) = (1+z)f\left(\frac{z}{1+z}\right)$ .

The proof can be found in Menon and Ong (2016).

### A.2 Proofs of technical results

Here, we provide technical proofs of our results.

#### A.2.1 Proof of Proposition 1

*Proof.*

$$\begin{aligned}
 & \left\| \mathbb{E}_{\pi_0} [\phi(a) \otimes \psi(s) \hat{\rho}] - \mathbb{E}_{\pi_1} [\phi(a_i) \otimes \psi(s)] \right\|_1 \\
 &= \left\| \mathbb{E}_{\pi_0} [\phi(a) \otimes \psi(s) \hat{\rho}(a, s)] - \mathbb{E}_{\pi_0} [\phi(a) \otimes \psi(s) \rho] \right\|_1 \\
 &= \left\| \sum_i^N \phi(a_i) \otimes \psi(s_i) \hat{\rho}(a_i, s_i) \pi_0(a_i, s_i) - \sum_i^N \phi(s_i) \otimes \psi(s_i) \frac{\pi_1(a_i, s_i)}{\pi_0(a, s)} \pi_0(a_i, s_i) \right\|_1 \\
 &= \left\| \sum_i^N \phi(a_i) \psi(s_i) \pi_0(a_i, s_i) \hat{\rho}(a_i, s_i) - \phi(a_i) \otimes \psi(s_i) \pi_1(a_i, s_i) \right\|_1 \\
 &= \left\| \sum_i^N \phi(a_i) \psi(s_i) p(a_i, s_i) (\rho(a_i, s_i) + (\hat{\rho}(a_i, s_i) - \rho(a_i, s_i))) - \phi(a_i) \otimes \psi(s_i) \pi_1(a_i, s_i) \right\|_1 \\
 &= \left\| \sum_i^N \phi(a_i) \otimes \psi(s_i) \pi_0(a_i, s_i) (\hat{\rho}(a_i, s_i) - \rho(a_i, s_i)) \right\|_1 \\
 &= \left\| \mathbb{E}_{\pi_0(a, s)} [\phi(a) \otimes \psi(x) (\hat{\rho} - \rho)] \right\|_1 \leq \left\| \mathbb{E}_{\pi_0(a, s)} [\phi(a) \otimes \psi(x) B(\hat{\rho}, \rho)] \right\|_1
 \end{aligned}$$

□

#### A.2.2 Proof of Proposition 2

Because the weights in the denominator  $\hat{V}^{\text{B-OPE}}$  are each consistent for 1, we have that the sum is consistent for  $n$ . Therefore, by the continuous mapping theorem, we can consider the expectation of a single term in the  $\hat{V}^{\text{B-OPE}}$  numerator.

Recall that  $\rho(a, s) = \frac{\pi_1(a, s)}{\pi_0(a, s)}$  denotes the true density ratio and  $\hat{\rho}(a, s)$  is the estimated density ratio. Further let  $\delta(a, s) = \hat{\rho}(a, s) - \rho(a, s)$ . First, we consider the discrete action setting. We can express the expectation as:

$$\begin{aligned}
 \mathbb{E}_{\pi_0} [\mathbf{1}_a(\pi_1(s)) \hat{\rho}(a, s) r(a, s)] &= \mathbb{E}_{\pi_0} [\mathbf{1}_a(\pi_1(s)) (\rho(a, s) + \delta(a, s)) r(a, s)] \\
 &= \mathbb{E}_{\pi_0} [\mathbf{1}_a(\pi_1(s)) \rho(a, s) r(a, s)] + \mathbb{E}_{\pi_0} [\mathbf{1}_a(\pi_1(s)) \delta(a, s) r(a, s)]
 \end{aligned}$$

We can show that the first term is equal to the policy value of  $\pi_1$ , while the second term provides the estimator's

bias. Considering the first term, we have:

$$\begin{aligned}
 \mathbb{E}_{\pi_0} [\mathbb{1}_a(\pi_1(s))\rho(a, s)r(a, s)] &= \sum_{(a, s)} \mathbb{1}_a(\pi_1(s))\rho(a, s)r(a, s)\pi_0(a, s) \\
 &= \sum_{(a, s)} \mathbb{1}_a(\pi_1(s))r(a, s)\pi_1(a, s) \\
 &= \sum_s r(\pi_1(s), s)\pi_1(\pi_1(s), s) \\
 &= \mathbb{E}_{\pi_1} [r_{\pi_1}],
 \end{aligned}$$

where  $r_{\pi_1}$  denotes  $r(\pi_1(s), s)$ .

Now, considering the bias term, and bounding  $\delta$  with the Bregman divergence between  $\rho$  and  $\hat{\rho}$ , we have:

$$\begin{aligned}
 \mathbb{E}_{\pi_0} [\mathbb{1}_a(\pi_1(s))\delta(a, s)r(a, s)] &= \sum_{(a, s)} \mathbb{1}_a(\pi_1(s))\delta(a, s)r(a, s)\pi_0(a, s) \\
 &\leq \sum_{(a, s)} \mathbb{1}_a(\pi_1(s))B(\rho, \hat{\rho})r(a, s)\pi_0(a, s) \\
 &= \sum_s B(\rho, \hat{\rho})r(\pi_1(s), s)\pi_0(\pi_1(s), s) \\
 &= \mathbb{E}_{\pi_0} [B(\rho, \hat{\rho})r_{\pi_1}]
 \end{aligned}$$

We now move on to the continuous action setting. We can express the expectation as:

$$\begin{aligned}
 &\mathbb{E}_{\pi_0} \left[ \frac{1}{h}K \left( \frac{a - \pi_1(s)}{h} \right) \hat{\rho}(a, s)r(a, s) \right] \\
 &= \int \frac{1}{h}K \left( \frac{a - \pi_1(s)}{h} \right) (\rho(a, s) + \delta(a, s)) r(a, s)\pi_0(a, s)d(a, s) \\
 &= \int \frac{1}{h}K \left( \frac{a - \pi_1(s)}{h} \right) \rho(a, s)r(a, s)\pi_0(a, s)d(a, s) \\
 &\quad + \int \frac{1}{h}K \left( \frac{a - \pi_1(s)}{h} \right) \delta(a, s)r(a, s)\pi_0(a, s)d(a, s)
 \end{aligned}$$

We can show that the first term is equal to the true counterfactual policy value, while the second term describes the bias induced from estimating the density ratio. Considering the first term, we have:

$$\int \frac{1}{h}K \left( \frac{a - \pi_1(s)}{h} \right) \frac{\pi_1(a, s)}{\pi_0(a, s)} r(a, s)\pi_0(s, a)d(s, a) = \int \frac{1}{h}K \left( \frac{a - \pi_1(s)}{h} \right) r(a, s)\pi_1(a, s)d(s, a)$$

Let  $u = \frac{a - \pi_1(s)}{h}$ . Thus,  $a = \pi_1(s) + hu$  and  $da = hdu$ . Then, taking a second-order Taylor expansion of  $\pi_1$

around  $\pi_1(s)$ :

$$\begin{aligned}
 & \int \frac{1}{h} K \left( \frac{a - \pi_1(s)}{h} \right) \frac{\pi_1(a, s)}{\pi_0(a, s)} r(a, s) \pi_0(s, a) d(s, a) \\
 &= \int K(u) r(\pi_1(s) + hu, s) \pi_1(\pi_1(s) + hu, s) d(s, u) \\
 &= \int K(u) r(\pi_1(s), s) \pi_1(\pi_1(s), s) d(s, u) + \int K(u) r(\pi_1(s), s) \pi_1'(\pi_1(s), s) (hu) d(s, u) \\
 &\quad + \int K(u) r(\pi_1(s), s) \pi_1''(\pi_1(s), s) \frac{(hu)^2}{2} d(s, u) + \int K(u) o(h^2) r(\pi_1(s), s) d(s, u) \\
 &= \int K(u) du \int r(\pi_1(s), s) \pi_1(\pi_1(s), s) ds + \int u K(u) du \int r(\pi_1(s), s) \pi_1'(\pi_1(s), s) h d(s, u) \\
 &\quad + \int u^2 K(u) du \int \frac{h^2}{2} r(\pi_1(s), s) \pi_1''(\pi_1(s), s) ds + \int K(u) du \int o(h^2) r(\pi_1(s), s) ds \\
 &= \int r(\pi_1(s), s) \pi_1(\pi_1(s), s) ds + o(h^2) \\
 &= E_{\pi_1}[r_{\pi_1}] + o(h^2).
 \end{aligned}$$

This result follows similarly to those in Kallus and Zhou (2018), by properties of kernels, bounded rewards, and since  $\pi_1(a, s)$  has a bounded second derivative with respect to  $a$ .

Now, considering the bias term, we use the same  $u$ -substitution and Taylor expansion as before. We also bound  $\delta$  by the Bregman divergence between  $\rho$  and  $\hat{\rho}$ , yielding:

$$\begin{aligned}
 \int \frac{1}{h} K \left( \frac{a - \pi_1(s)}{h} \right) \delta(a, s) r(a, s) \pi_0(a, s) d(a, s) &\leq \int \frac{1}{h} K \left( \frac{a - \pi_1(s)}{h} \right) B(\rho, \hat{\rho}) r(a, s) \pi_0(a, s) d(a, s) \\
 &= \int K(u) B(\rho, \hat{\rho}) r(\pi_1(s) + hu) \pi_0(\pi_1(s) + hu, s) d(u, s) \\
 &= \int K(u) du \int B(\rho, \hat{\rho}) r(\pi_1(s), s) \pi_0(\pi_1(s), s) ds + \text{Rem}(h) \\
 &= \int B(\rho, \hat{\rho}) r(\pi_1(s), s) \pi_0(\pi_1(s), s) ds + o(h^2) \\
 &= E_{\pi_0}[B(\rho, \hat{\rho}) r_{\pi_1}] + o(h^2)
 \end{aligned}$$

### A.2.3 Proof of Proposition 3

We consider the second moment of a single numerator term, and write the estimator in terms of  $\rho$  and  $\delta$  as above. We first consider the discrete action setting.

$$\begin{aligned}
 \mathbb{E}_{\pi_0} [\mathbf{1}_a(\pi_1(s))^2 \hat{\rho}(a, s)^2 r(a, s)^2] &= \mathbb{E}_{\pi_0} [\mathbf{1}_a(\pi_1(s))(\rho(a, s) + \delta(a, s))^2 r(a, s)^2] \\
 &= \mathbb{E}_{\pi_0} [\mathbf{1}_a(\pi_1(s))(\rho(a, s)^2 + \delta(a, s)^2 + 2\rho(a, s)\delta(a, s))r(a, s)^2] \\
 &= \sum_{(a, s)} \mathbf{1}_a(\pi_1(s))\rho(a, s)^2 r(a, s)^2 \pi_0(a, s) \\
 &\quad + \sum_{(a, s)} \mathbf{1}_a(\pi_1(s))\delta(a, s)^2 r(a, s)^2 \pi_0(a, s) \\
 &\quad + \sum_{(a, s)} \mathbf{1}_a(\pi_1(s))2\rho(a, s)\delta(a, s)r(a, s)^2 \pi_0(a, s) \\
 &\leq \sum_s \rho(\pi_1(s), s)r(\pi_1(s), s)^2 \pi_1(\pi_1(s), s) \\
 &\quad + \sum_s 2B(\rho, \hat{\rho})\rho(\pi_1(s), s)r(\pi_1(s), s)^2 \pi_0(\pi_1(s), s) \\
 &\quad + \sum_s B(\rho, \hat{\rho})^2 r(\pi_1(s), s)^2 \pi_0(\pi_1(s), s) \\
 &= \mathbb{E}_{\pi_1} [\rho(\pi_1(s), s)r_{\pi_1}^2] + \mathbb{E}_{\pi_0} [B(\rho, \hat{\rho})^2 r_{\pi_1}^2] + \mathbb{E}_{\pi_0} [2B(\rho, \hat{\rho})\rho(\pi_1(s), s)r_{\pi_1}^2]
 \end{aligned}$$

Therefore, the variance of the estimator is bounded by:

$$\frac{1}{n} (\mathbb{E}_{\pi_1} [\rho(\pi_1(s), s)r_{\pi_1}^2] + \mathbb{E}_{\pi_0} [B(\rho, \hat{\rho})^2 r_{\pi_1}^2] + \mathbb{E}_{\pi_0} [2B(\rho, \hat{\rho})\rho(\pi_1(s), s)r_{\pi_1}^2])$$

Next, we consider the second moment of a term in the estimator in the continuous action setting:

$$\begin{aligned}
 &\mathbb{E}_{\pi_0} \left[ \left( \frac{1}{h} K \left( \frac{a - \pi_1(s)}{h} \right) \hat{\rho}(a, s) r(a, s) \right)^2 \right] \\
 &= \int \frac{1}{h^2} K \left( \frac{a - \pi_1(s)}{h} \right)^2 (\rho(a, s) + \delta(a, s))^2 r(a, s)^2 \pi_0(a, s) d(a, s)
 \end{aligned}$$

We substitute  $u = \frac{a - \pi_1(s)}{h}$  as before. Then,  $a = \pi_1(s) + hu$  and  $da = hdu$ .

$$\begin{aligned}
 &\mathbb{E}_{\pi_0} \left[ \left( \frac{1}{h} K \left( \frac{a - \pi_1(s)}{h} \right) \hat{\rho}(a, s) r(a, s) \right)^2 \right] \\
 &= \int \frac{1}{h} K(u)^2 (\rho(\pi_1(s) + hu, s) + \delta(\pi_1(s) + hu, s))^2 r(\pi_1(s) + hu)^2 \pi_0(\pi_1(s) + hu, s) d(s, u)
 \end{aligned}$$

Next, we apply a second-order Taylor series expansion of  $\rho$ ,  $\delta$ , and  $\pi_0$  around  $\pi_1(s)$ . Given that these functions have bounded second derivatives, we can bound the remainder by  $o(h^{-1})$ , as in Kallus and Zhou (2018). This

yields:

$$\begin{aligned}
 & \mathbb{E}_{\pi_0} \left[ \left( \frac{1}{h} K \left( \frac{a - \pi_1(s)}{h} \right) \hat{\rho}(a, s) r(a, s) \right)^2 \right] \\
 &= \int \frac{1}{h} K(u)^2 du \int (\rho(\pi_1(s), s) + \delta(\pi_1(s), s))^2 r(\pi_1(s), s)^2 \pi_0(\pi_1(s), s) ds + o(h^{-1}) \\
 &= \frac{R(K)}{h} \int (\rho(\pi_1(s), s) + \delta(\pi_1(s), s))^2 r(\pi_1(s), a)^2 \pi_0(\pi_1(s), s) ds + o(h^{-1}) \\
 &= \frac{R(K)}{h} \int (\rho(\pi_1(s), s)^2 + \delta(\pi_1(s), s)^2 + 2\rho(\pi_1(s), s)\delta(\pi_1(s), s)) r(\pi_1(s), a)^2 \pi_0(\pi_1(s), s) ds + o(h^{-1}) \\
 &= \frac{R(K)}{h} \left[ \int \rho(\pi_1(s), s)^2 r_{\pi_1}^2 \pi_0(\pi_1(s), s) ds + \int \delta(\pi_1(s), s)^2 r_{\pi_1}^2 \pi_0(\pi_1(s), s) ds + \int 2\rho(\pi_1(s), s)\delta(\pi_1(s), s) r_{\pi_1}^2 \pi_0(\pi_1(s), s) ds \right] \\
 &+ o(h^{-1}) \\
 &= \frac{R(K)}{h} \left[ \int \rho(\pi_1(s), s) r_{\pi_1}^2 \pi_1(\pi_1(s), s) ds + \int \delta(\pi_1(s), s) r_{\pi_1}^2 \pi_0(\pi_1(s), s) ds + \int 2\delta(\pi_1(s), s) r_{\pi_1}^2 \pi_1(\pi_1(s), s) ds \right] \\
 &+ o(h^{-1})
 \end{aligned}$$

where  $R(K) := \int K(u)^2 du$  is some constant.

Then, bounding  $\delta$  by the Bregman divergence  $B$ ,

$$\begin{aligned}
 & \mathbb{E}_{\pi_0} \left[ \left( \frac{1}{h} K \left( \frac{a - \pi_1(s)}{h} \right) \hat{\rho}(a, s) r \right)^2 \right] \\
 & \leq \frac{R(K)}{h} [\mathbb{E}_{\pi_1}[\rho(\pi_1(s), s) r_{\pi_1}^2] + \mathbb{E}_{\pi_0}[B(\rho, \hat{\rho})^2 r_{\pi_1}^2] + \mathbb{E}_{\pi_1}[2B(\rho, \hat{\rho}) r_{\pi_1}^2]] + o(h^{-1})
 \end{aligned}$$

Therefore, the variance of our estimator is bounded by:

$$\frac{R(K)}{nh} (\mathbb{E}_{\pi_1}[\rho(\pi_1(s), s) r_{\pi_1}^2] + \mathbb{E}_{\pi_0}[B(\rho, \hat{\rho})^2 r_{\pi_1}^2] + \mathbb{E}_{\pi_1}[2B(\rho, \hat{\rho}) r_{\pi_1}^2]) + o\left(\frac{1}{nh}\right)$$

### A.3 Evaluation details and full results

Table 1: Summary of datasets used in discrete reward experiments

| Dataset              | ecoli | glass | letters | optdigits | page-blocks | pendigits | satimage | vehicle | yeast |
|----------------------|-------|-------|---------|-----------|-------------|-----------|----------|---------|-------|
| Classes ( $k$ )      | 5     | 6     | 26      | 10        | 5           | 10        | 6        | 4       | 9     |
| Observations ( $n$ ) | 327   | 214   | 20000   | 5620      | 5473        | 10992     | 6435     | 846     | 1479  |
| Covariates ( $p$ )   | 7     | 9     | 16      | 64        | 10          | 16        | 36       | 18      | 8     |

Table 2: Summary of datasets used in continuous reward experiments

| Dataset              | abalone | admissions | airfoil | auto | housing | power | wine |
|----------------------|---------|------------|---------|------|---------|-------|------|
| Observations ( $n$ ) | 4177    | 400        | 1503    | 392  | 10000   | 9568  | 1599 |
| Covariates ( $p$ )   | 10      | 7          | 5       | 7    | 14      | 4     | 11   |

Table 3 shows the results of the discrete treatment simulations. Table 4 shows the results of the continuous treatment simulations.

### A.4 Data sources

The sources for the datasets used in the experiments, along with necessary citations, can be found below.

Table 3: Discrete evaluation  
 First row for each dataset is absolute bias, second is RMSE

| Dataset    | Direct Method          | IPS                    |                        |                        |                        |                        |                        | B-OPE                  |                        |  |  |  |  |
|------------|------------------------|------------------------|------------------------|------------------------|------------------------|------------------------|------------------------|------------------------|------------------------|--|--|--|--|
|            |                        | IPS                    | Doubly Robust          | SWITCH                 | SWITCH-DR              | B-OPE                  | Doubly Robust          | SWITCH                 | SWITCH-DR              |  |  |  |  |
| ecoli      | 0.211<br>0.220 ± 0.006 | 0.016<br>0.123 ± 0.012 | 0.068<br>0.189 ± 0.015 | 0.098<br>0.139 ± 0.010 | 0.193<br>0.203 ± 0.006 | 0.030<br>0.078 ± 0.003 | 0.001<br>0.112 ± 0.009 | 0.074<br>0.109 ± 0.007 | 0.074<br>0.166 ± 0.006 |  |  |  |  |
| glass      | 0.300<br>0.312 ± 0.008 | 0.033<br>0.207 ± 0.012 | 0.092<br>0.253 ± 0.016 | 0.207<br>0.267 ± 0.015 | 0.290<br>0.303 ± 0.009 | 0.121<br>0.174 ± 0.008 | 0.128<br>0.199 ± 0.012 | 0.167<br>0.214 ± 0.012 | 0.235<br>0.256 ± 0.010 |  |  |  |  |
| letters    | 0.451<br>0.451 ± 0.002 | 0.010<br>0.029 ± 0.002 | 0.070<br>0.097 ± 0.006 | 0.435<br>0.441 ± 0.005 | 0.438<br>0.439 ± 0.003 | 0.028<br>0.029 ± 0.001 | 0.076<br>0.081 ± 0.003 | 0.010<br>0.017 ± 0.001 | 0.243<br>0.245 ± 0.003 |  |  |  |  |
| optdigits  | 0.217<br>0.218 ± 0.002 | 0.007<br>0.031 ± 0.004 | 0.047<br>0.084 ± 0.006 | 0.023<br>0.027 ± 0.002 | 0.179<br>0.181 ± 0.002 | 0.017<br>0.018 ± 0.000 | 0.051<br>0.058 ± 0.003 | 0.005<br>0.010 ± 0.001 | 0.128<br>0.130 ± 0.002 |  |  |  |  |
| pageblocks | 0.016<br>0.017 ± 0.001 | 0.024<br>0.035 ± 0.004 | 0.034<br>0.051 ± 0.004 | 0.003<br>0.008 ± 0.000 | 0.005<br>0.010 ± 0.001 | 0.010<br>0.015 ± 0.001 | 0.011<br>0.029 ± 0.005 | 0.009<br>0.012 ± 0.001 | 0.003<br>0.007 ± 0.001 |  |  |  |  |
| pendigits  | 0.130<br>0.130 ± 0.001 | 0.001<br>0.010 ± 0.001 | 0.047<br>0.062 ± 0.004 | 0.008<br>0.010 ± 0.001 | 0.081<br>0.081 ± 0.001 | 0.008<br>0.008 ± 0.000 | 0.019<br>0.025 ± 0.001 | 0.019<br>0.004 ± 0.000 | 0.064<br>0.065 ± 0.001 |  |  |  |  |
| sat        | 0.052<br>0.053 ± 0.001 | 0.012<br>0.023 ± 0.001 | 0.013<br>0.033 ± 0.002 | 0.004<br>0.015 ± 0.001 | 0.020<br>0.024 ± 0.001 | 0.041<br>0.043 ± 0.001 | 0.003<br>0.023 ± 0.002 | 0.016<br>0.020 ± 0.001 | 0.025<br>0.027 ± 0.001 |  |  |  |  |
| vehicle    | 0.056<br>0.069 ± 0.003 | 0.000<br>0.119 ± 0.009 | 0.031<br>0.136 ± 0.011 | 0.017<br>0.058 ± 0.003 | 0.043<br>0.056 ± 0.003 | 0.112<br>0.126 ± 0.005 | 0.041<br>0.079 ± 0.005 | 0.014<br>0.047 ± 0.003 | 0.018<br>0.043 ± 0.003 |  |  |  |  |
| yeast      | 0.110<br>0.120 ± 0.005 | 0.037<br>0.152 ± 0.009 | 0.053<br>0.178 ± 0.012 | 0.060<br>0.092 ± 0.006 | 0.104<br>0.114 ± 0.005 | 0.083<br>0.114 ± 0.006 | 0.024<br>0.095 ± 0.007 | 0.039<br>0.075 ± 0.006 | 0.071<br>0.085 ± 0.005 |  |  |  |  |

Table 4: Continuous evaluation  
 First row for each dataset is absolute bias, second is RMSE

| Dataset    | Direct Method | IPS           |               |               |               |               |               | B-OPE         |               |               |               |               |               |
|------------|---------------|---------------|---------------|---------------|---------------|---------------|---------------|---------------|---------------|---------------|---------------|---------------|---------------|
|            |               | IPS           | Doubly Robust | SWITCH        | SWITCH-DR     | B-OPE         | Doubly Robust | SWITCH        | SWITCH-DR     | B-OPE         | Doubly Robust | SWITCH        | SWITCH-DR     |
| abalone    | 0.406         | 0.116         | 1.107         | 0.090         | 0.389         | 0.114         | 0.275         | 0.151         | 0.312         | 0.130 ± 0.003 | 0.287 ± 0.005 | 0.160 ± 0.005 | 0.317 ± 0.006 |
| admissions | 0.408 ± 0.003 | 1.070 ± 0.134 | 2.879 ± 0.261 | 0.298 ± 0.024 | 0.393 ± 0.005 | 0.045         | 0.029         | 0.023         | 0.151         | 0.130 ± 0.003 | 0.287 ± 0.005 | 0.160 ± 0.005 | 0.317 ± 0.006 |
|            | 0.345         | 0.029         | 0.318         | 0.264         | 0.343         | 0.045         | 0.029         | 0.023         | 0.151         | 0.130 ± 0.003 | 0.287 ± 0.005 | 0.160 ± 0.005 | 0.317 ± 0.006 |
| airfoil    | 0.358 ± 0.006 | 0.394 ± 0.032 | 1.137 ± 0.105 | 0.304 ± 0.014 | 0.356 ± 0.010 | 0.170 ± 0.011 | 0.257 ± 0.015 | 0.103 ± 0.008 | 0.223 ± 0.013 | 0.170 ± 0.011 | 0.257 ± 0.015 | 0.103 ± 0.008 | 0.223 ± 0.013 |
|            | 0.690         | 0.030         | 0.723         | 0.000         | 0.479         | 0.009         | 0.016         | 0.006         | 0.195         | 0.170 ± 0.011 | 0.257 ± 0.015 | 0.103 ± 0.008 | 0.223 ± 0.013 |
| auto       | 0.693 ± 0.003 | 0.128 ± 0.022 | 1.517 ± 0.124 | 0.045 ± 0.004 | 0.522 ± 0.016 | 0.030 ± 0.002 | 0.266 ± 0.019 | 0.027 ± 0.003 | 0.236 ± 0.011 | 0.030 ± 0.002 | 0.266 ± 0.019 | 0.027 ± 0.003 | 0.236 ± 0.011 |
|            | 0.396         | 0.028         | 0.355         | 0.315         | 0.399         | 0.013         | 0.012         | 0.030         | 0.148         | 0.030 ± 0.002 | 0.266 ± 0.019 | 0.027 ± 0.003 | 0.236 ± 0.011 |
| housing    | 0.406 ± 0.005 | 0.324 ± 0.040 | 1.272 ± 0.138 | 0.336 ± 0.011 | 0.409 ± 0.010 | 0.071 ± 0.005 | 0.181 ± 0.010 | 0.058 ± 0.004 | 0.199 ± 0.015 | 0.071 ± 0.005 | 0.181 ± 0.010 | 0.058 ± 0.004 | 0.199 ± 0.015 |
|            | 0.538         | 0.091         | 0.411         | 0.057         | 0.537         | 0.111         | 0.404         | 0.116         | 0.445         | 0.071 ± 0.005 | 0.181 ± 0.010 | 0.058 ± 0.004 | 0.199 ± 0.015 |
| power      | 0.542 ± 0.004 | 1.367 ± 0.483 | 3.668 ± 0.590 | 0.172 ± 0.056 | 0.541 ± 0.007 | 0.130 ± 0.007 | 0.445 ± 0.007 | 0.123 ± 0.002 | 0.456 ± 0.008 | 0.130 ± 0.007 | 0.445 ± 0.007 | 0.123 ± 0.002 | 0.456 ± 0.008 |
|            | 0.108         | 0.012         | 0.023         | 0.003         | 0.057         | 0.010         | 0.012         | 0.003         | 0.022         | 0.130 ± 0.007 | 0.445 ± 0.007 | 0.123 ± 0.002 | 0.456 ± 0.008 |
| wine       | 0.109 ± 0.001 | 0.060 ± 0.020 | 0.138 ± 0.012 | 0.015 ± 0.003 | 0.062 ± 0.002 | 0.040 ± 0.007 | 0.066 ± 0.005 | 0.013 ± 0.002 | 0.036 ± 0.003 | 0.040 ± 0.007 | 0.066 ± 0.005 | 0.013 ± 0.002 | 0.036 ± 0.003 |
|            | 0.483         | 0.253         | 1.502         | 0.282         | 0.473         | 0.197         | 0.165         | 0.155         | 0.433         | 0.040 ± 0.007 | 0.066 ± 0.005 | 0.013 ± 0.002 | 0.036 ± 0.003 |
|            | 0.488 ± 0.004 | 0.825 ± 0.097 | 3.737 ± 0.524 | 0.487 ± 0.016 | 0.478 ± 0.007 | 0.205 ± 0.003 | 0.191 ± 0.005 | 0.188 ± 0.008 | 0.439 ± 0.007 | 0.205 ± 0.003 | 0.191 ± 0.005 | 0.188 ± 0.008 | 0.439 ± 0.007 |

| Dataset                 | URL                                                                                                                                                                                   |
|-------------------------|---------------------------------------------------------------------------------------------------------------------------------------------------------------------------------------|
| ecoli                   | <a href="https://archive.ics.uci.edu/ml/datasets/ecoli">https://archive.ics.uci.edu/ml/datasets/ecoli</a>                                                                             |
| glass                   | <a href="https://archive.ics.uci.edu/ml/datasets/glass+identification">https://archive.ics.uci.edu/ml/datasets/glass+identification</a>                                               |
| letters                 | <a href="https://archive.ics.uci.edu/ml/datasets/letter+recognition">https://archive.ics.uci.edu/ml/datasets/letter+recognition</a>                                                   |
| optdigits               | <a href="https://archive.ics.uci.edu/ml/datasets/optical+recognition+of+handwritten+digits">https://archive.ics.uci.edu/ml/datasets/optical+recognition+of+handwritten+digits</a>     |
| page-blocks             | <a href="https://archive.ics.uci.edu/ml/datasets/Page+Blocks+Classification">https://archive.ics.uci.edu/ml/datasets/Page+Blocks+Classification</a>                                   |
| pendigits               | <a href="https://archive.ics.uci.edu/ml/datasets/Pen-Based+Recognition+of+Handwritten+Digits">https://archive.ics.uci.edu/ml/datasets/Pen-Based+Recognition+of+Handwritten+Digits</a> |
| satimage                | <a href="https://archive.ics.uci.edu/ml/datasets/Satlog+(Landsat+Satellite)">https://archive.ics.uci.edu/ml/datasets/Satlog+(Landsat+Satellite)</a>                                   |
| vehicle <sup>a</sup>    | <a href="https://archive.ics.uci.edu/ml/datasets/Statlog+(Vehicle+Silhouettes)">https://archive.ics.uci.edu/ml/datasets/Statlog+(Vehicle+Silhouettes)</a>                             |
| yeast                   | <a href="https://archive.ics.uci.edu/ml/datasets/Yeast">https://archive.ics.uci.edu/ml/datasets/Yeast</a>                                                                             |
| abalone                 | <a href="https://archive.ics.uci.edu/ml/datasets/abalone">https://archive.ics.uci.edu/ml/datasets/abalone</a>                                                                         |
| admissions <sup>b</sup> | <a href="https://www.kaggle.com/mohansacharya/graduate-admissions">https://www.kaggle.com/mohansacharya/graduate-admissions</a>                                                       |
| airfoil                 | <a href="https://archive.ics.uci.edu/ml/datasets/airfoil+self-noise">https://archive.ics.uci.edu/ml/datasets/airfoil+self-noise</a>                                                   |
| auto                    | <a href="https://archive.ics.uci.edu/ml/datasets/auto+mpg">https://archive.ics.uci.edu/ml/datasets/auto+mpg</a>                                                                       |
| housing                 | <a href="https://www.kaggle.com/harlfloxem/housesalesprediction">https://www.kaggle.com/harlfloxem/housesalesprediction</a>                                                           |
| power <sup>c</sup>      | <a href="https://archive.ics.uci.edu/ml/datasets/combined+cycle+power+plant">https://archive.ics.uci.edu/ml/datasets/combined+cycle+power+plant</a>                                   |
| wine <sup>d</sup>       | <a href="https://archive.ics.uci.edu/ml/datasets/wine+quality">https://archive.ics.uci.edu/ml/datasets/wine+quality</a>                                                               |

<sup>a</sup> (Siebert, 1987)<sup>b</sup> (Acharya *et al.*, 2019)<sup>c</sup> (Kaya *et al.*, 2012; Tüfekci, 2014)<sup>d</sup> (Cortez *et al.*, 2009)
